# Supplementary material for: Host diet and evolutionary history explain different aspects of gut microbiome diversity among vertebrate clades
Source: PubMed Central journal article supplement (PMC6522487; doi:10.1038/s41467-019-10191-3), 2019-05-16
Supplement: 41467_2019_10191_MOESM4_ESM.pdf [file 41467_2019_10191_MOESM4_ESM.pdf]

## **Description of Additional Supplementary Files**

File Name: Supplementary Data 1

Description: Metadata for each sample in the study.

File Name: Supplementary Data 2

Description: Pearson correlation coefficients of LIPA coefficients and 16S rRNA tree branch lengths between OTUs with a significant LIPA coefficient value for at least one host species. Only OTU comparisons with a normalized branch length of  $< 0.1$  and a Pearson coefficient of  $< 0$  are shown. Only OTUs found to have significant LIPA coefficient values in  $\geq 1$  host species were included in the analysis.

File Name: Supplementary Data 3

Description: Samples from the Earth Microbiome Project that were used to infer biome specificity of taxa (Supplementary Fig. 20).
